# Supplementary material
Source: Springer Nature journal article supplement (https://www.springerprofessional.de/resource/supplementary/13688_2012_2_MOESM2_ESM.pdf/11893952)

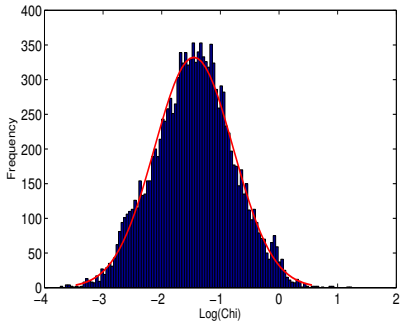

(a) Density Plot

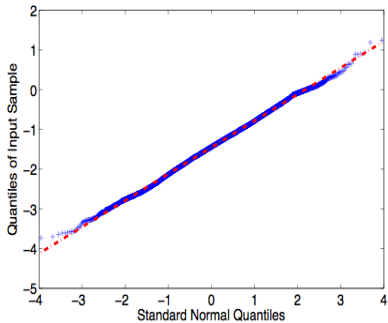

(b) Q-Q Plot

Supplement: MOESM2 [file 11893952]
